# Supplementary material for: Control of Crystallization of PBT-PC Blends by Anisotropic SiO2 and GeO2 Glass Flakes
Source: MDPI journal article supplement (doi:10.3390/polym14214555), 2022-10-27
Supplement: s1 [file s1]

## Supporting Information

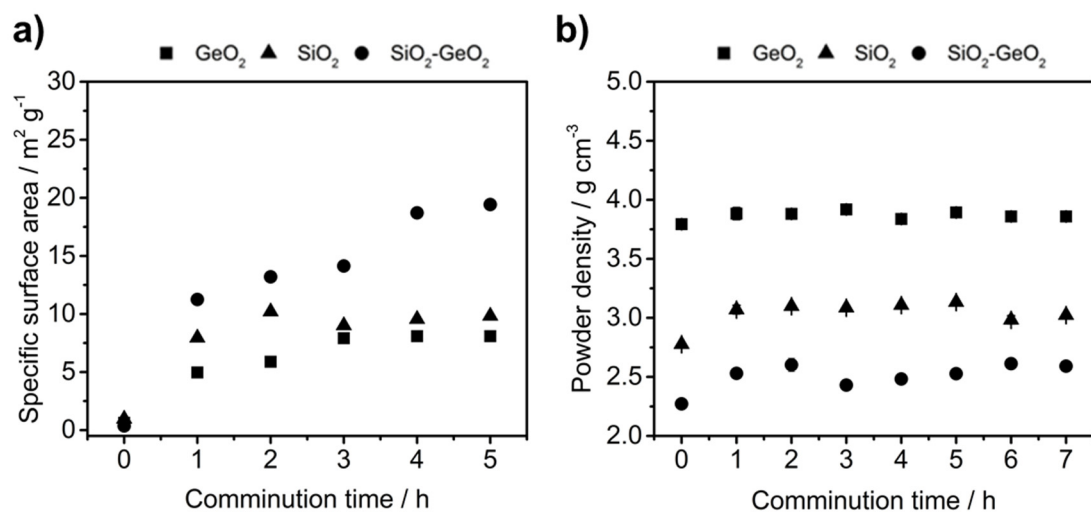

Figure S1. Surface area (a) and powder density (b) change of the utilized glasses with increasing comminution time.

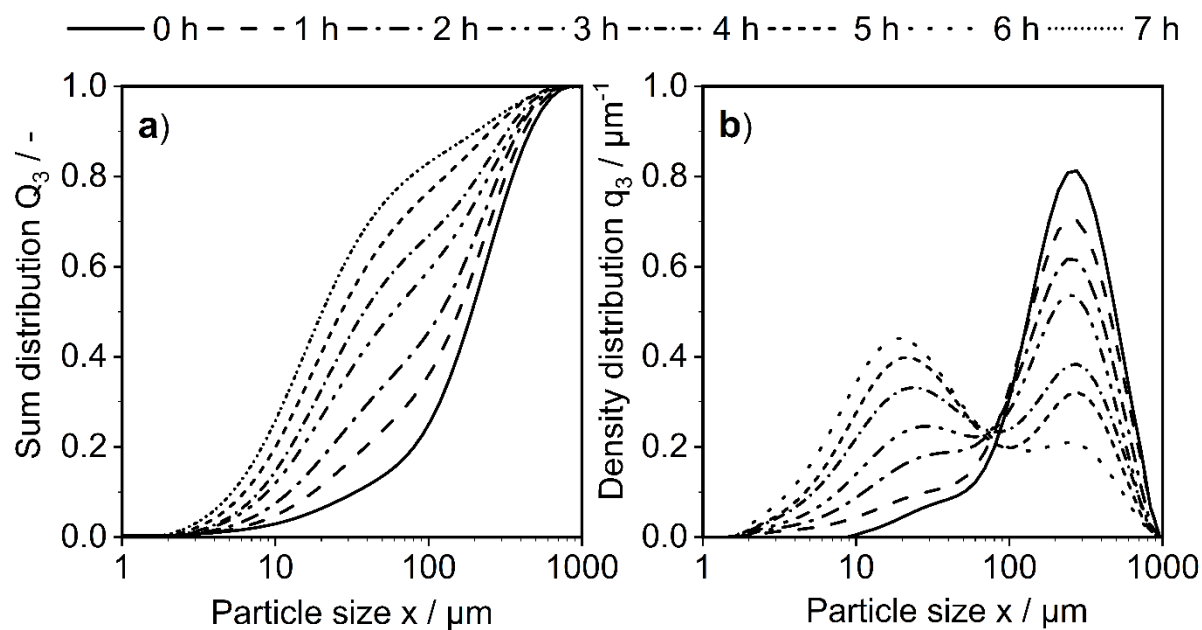

Figure S2. Particle size distributions (a) sum distribution  $Q_3$  and (b) density distribution  $q_3$

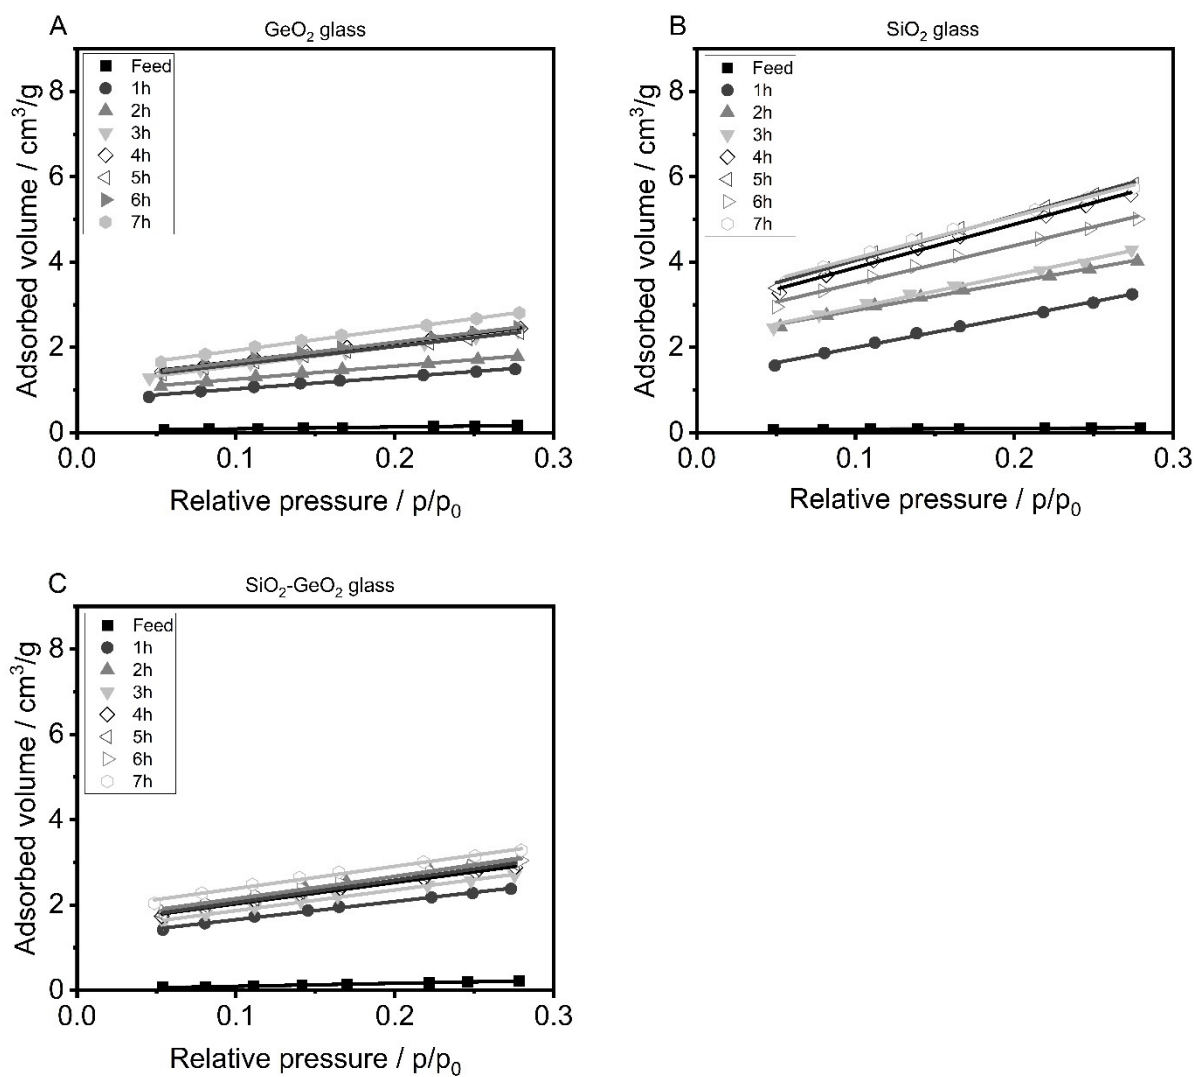

Figure S3. Multi-point BET measurement curves; (A) GeO<sub>2</sub> glass, (B) SiO<sub>2</sub> glass and (C) the 50:50 wt/wt mixture

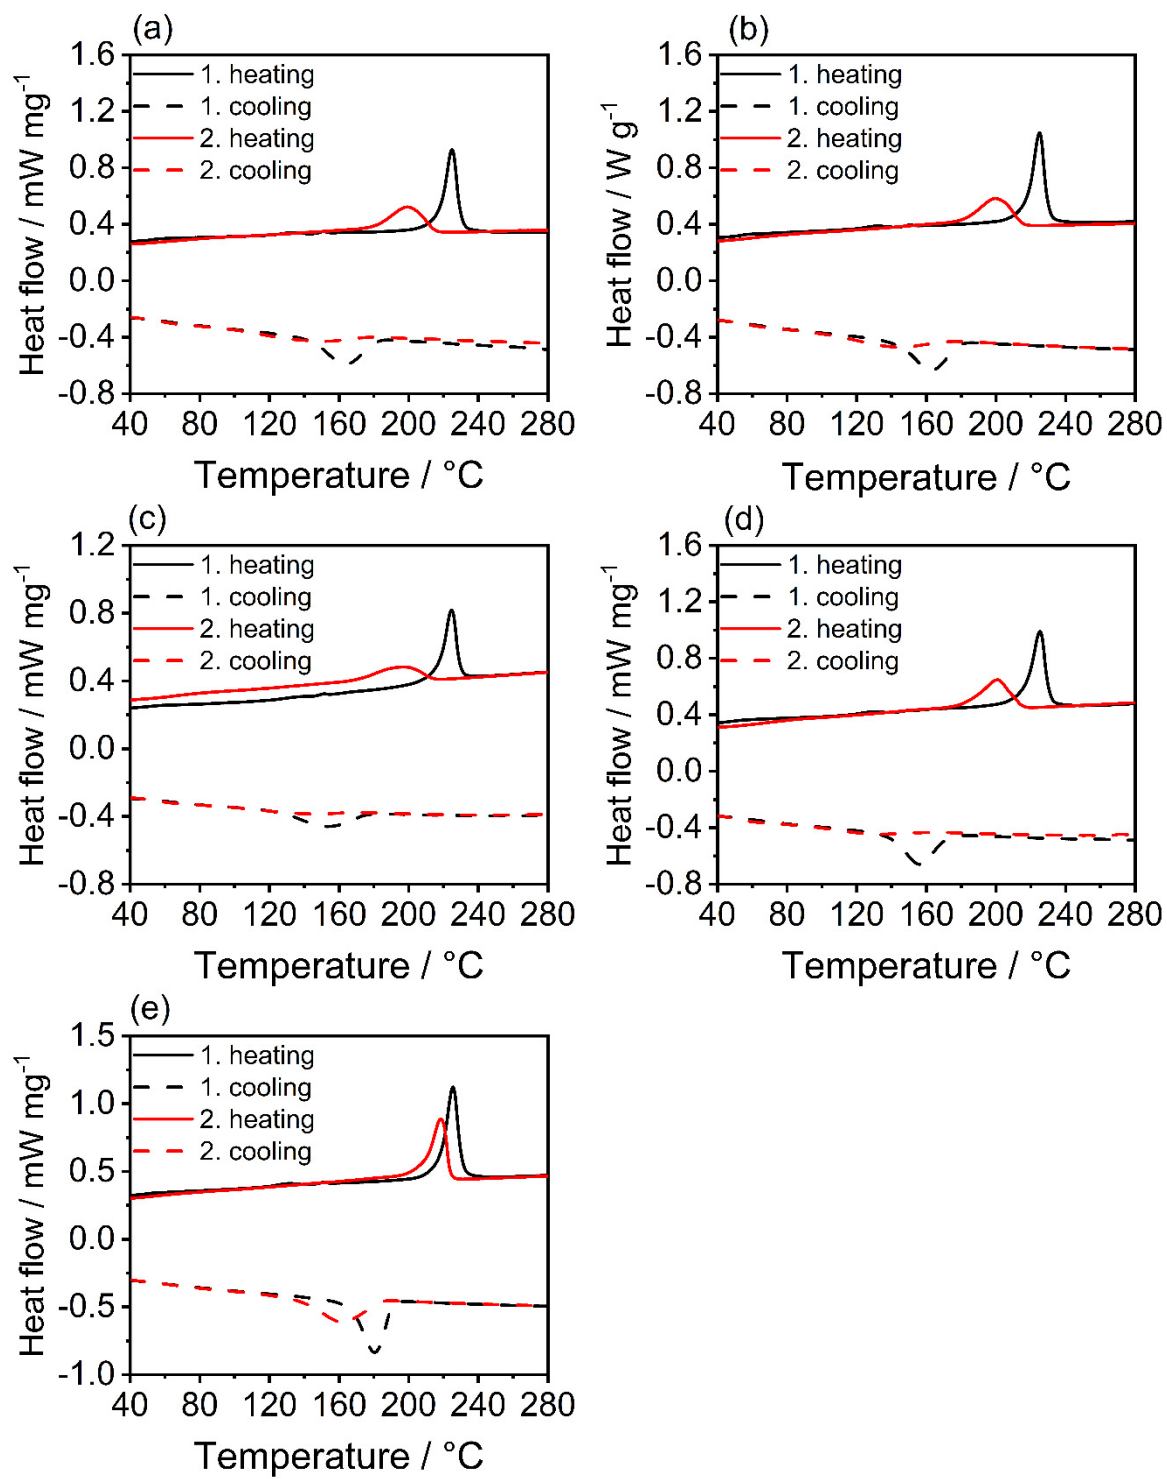

Figure S4. Example DSC curves of PBT-PC-GeO<sub>2</sub> (a) 0.05 wt.%; (b) 0.1 wt.%; (c) 0.25 wt.%; (d) 0.5 wt.%; (e) 1.0 wt.%;

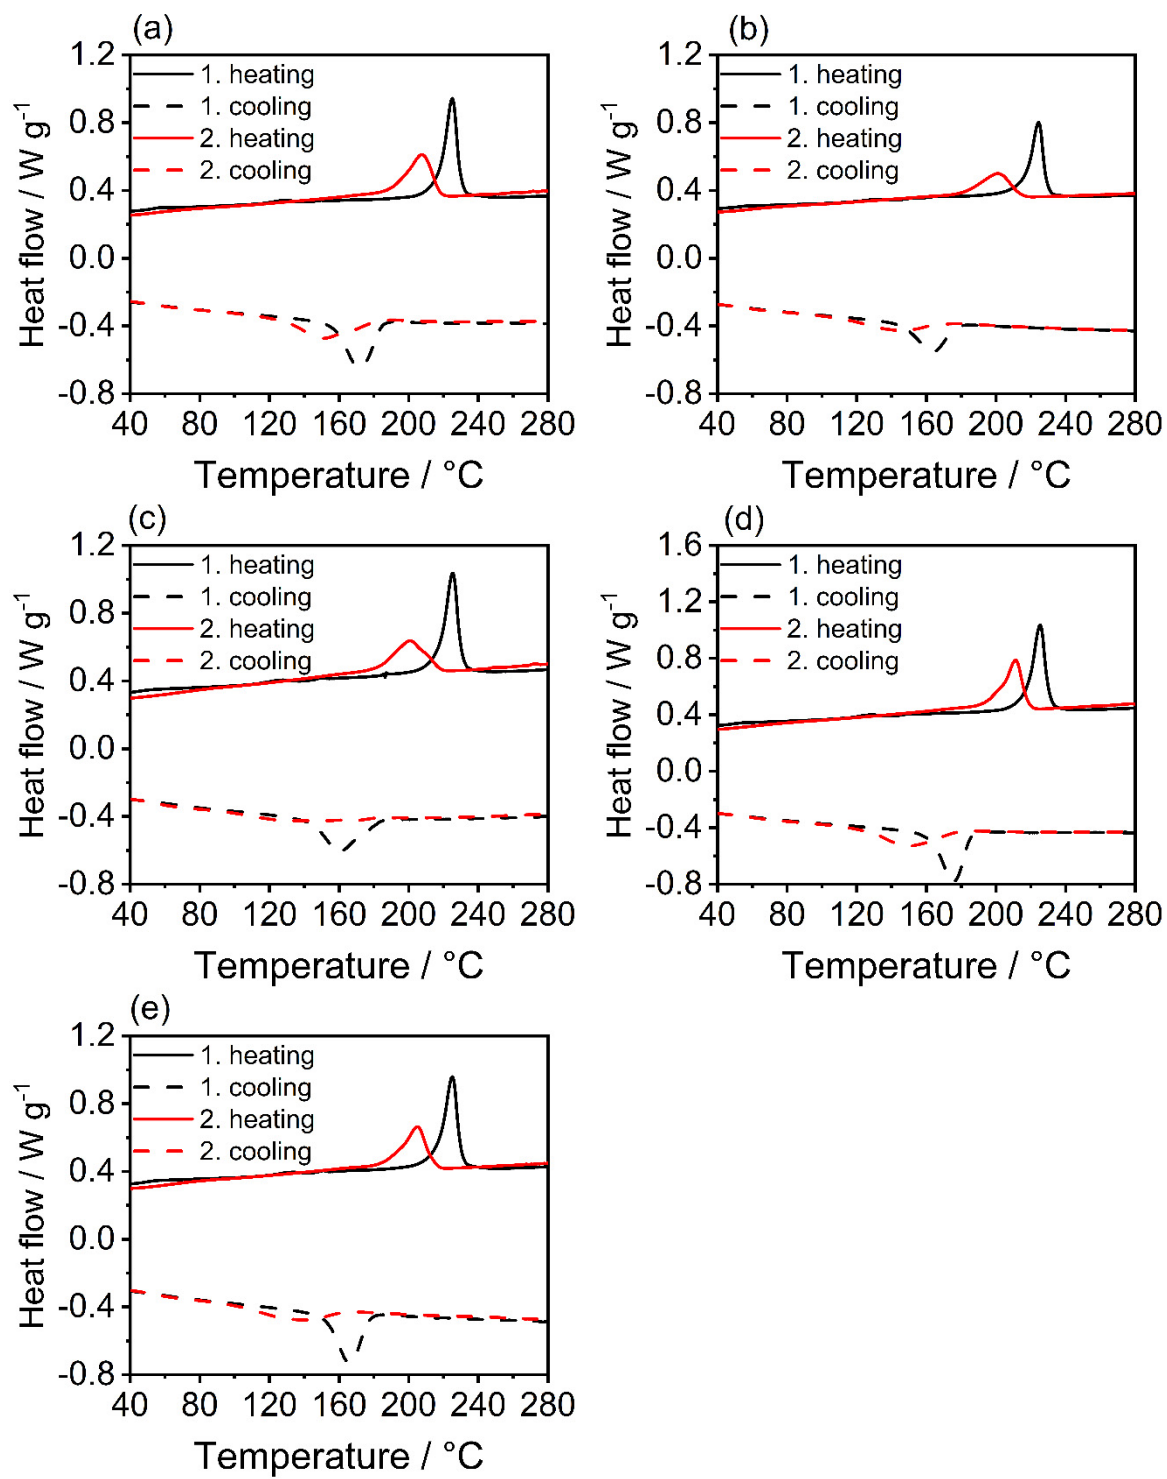

Figure S5. Example DSC curves of PBT-PC-SiO<sub>2</sub>-GeO<sub>2</sub> (a) 0.05 wt.%; (b) 0.1 wt.%; (c) 0.25 wt.%; (d) 0.5 wt.%; (e) 1.0 wt.%;

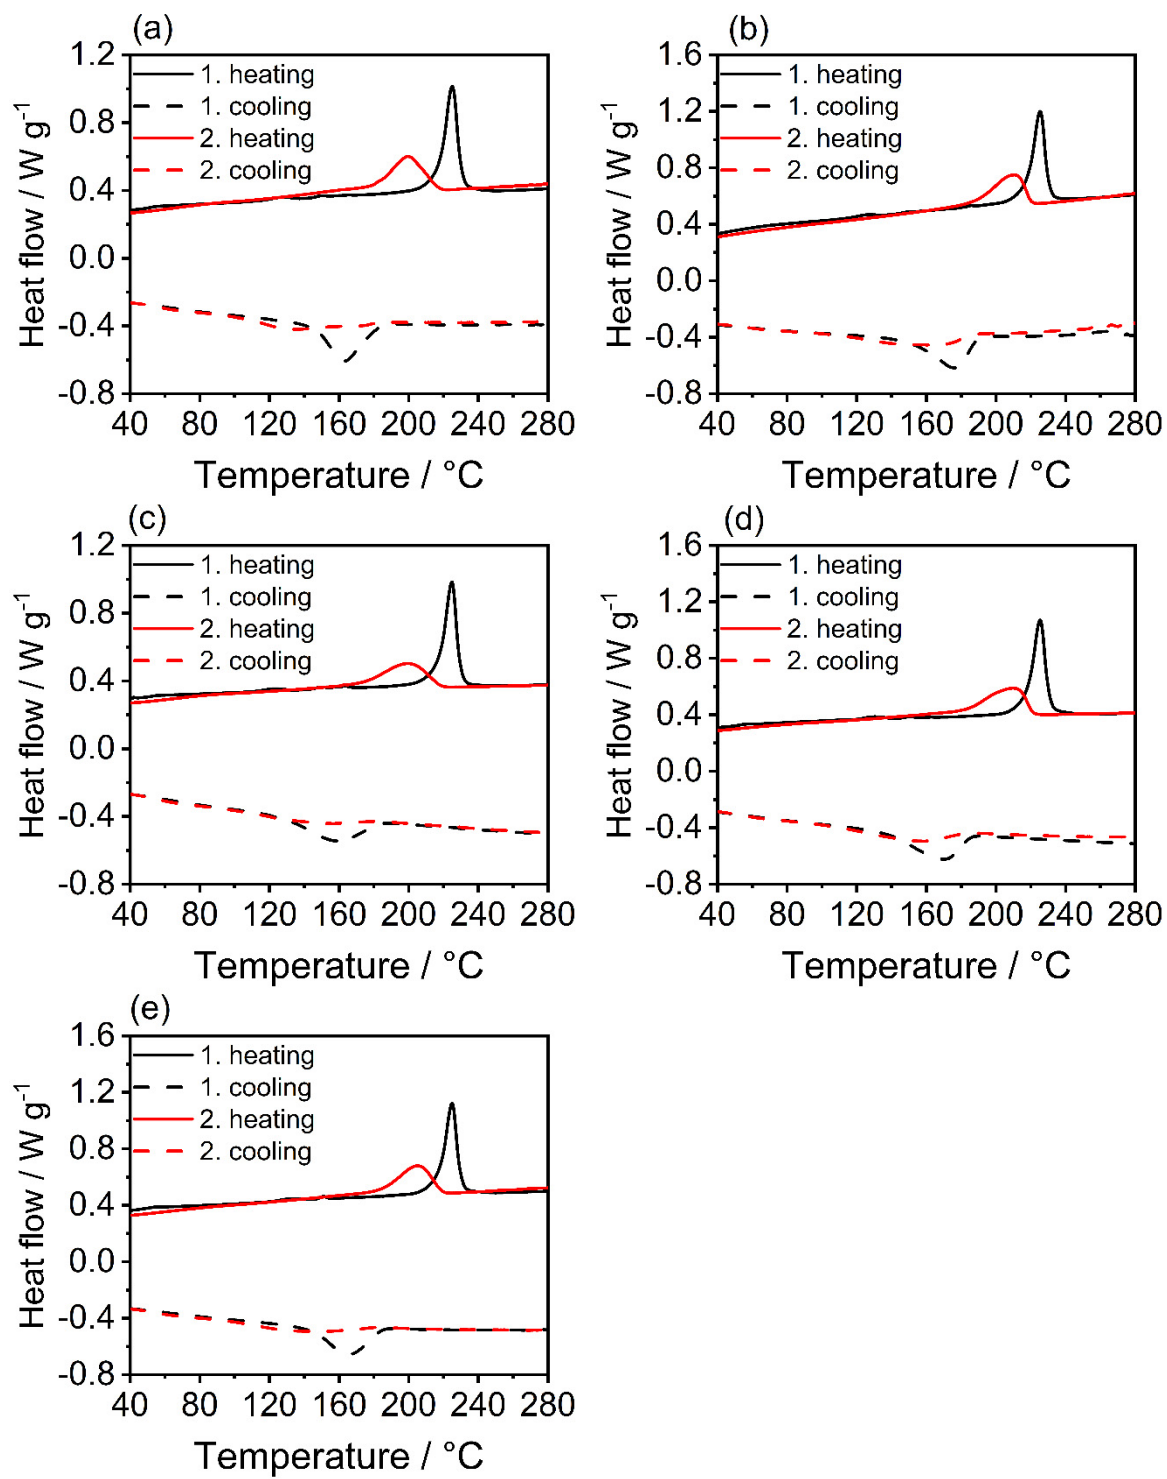

Figure S6. Example DSC curves of PBT-PC-SiO<sub>2</sub> (a) 0.05 wt.%; (b) 0.1 wt.%; (c) 0.25 wt.%; (d) 0.5 wt.%; (e) 1.0 wt.%;
